# Supplementary material
Source: MDPI journal article supplement (https://www.mdpi.com/1999-4907/12/4/494)
Supplement: s1 [file s1]

**Table S2.** Mean and standard error (SE) of the wood anatomical features of earlywood and latewood for each studied site and year. CA cell area, CWTrad radial cell wall thickness, CD/CWT ratio ratio of the cell diameter and radial cell wall thickness, TNo indices standardized tracheid number within a tracheid file

| Parameter       | Site | 1990  |       | 1991  |       | 1992   |       | 1993   |       | 2010   |       | Parameter       | Site | 1990  |       | 1991  |       | 1992  |       | 1993  |       | 2010  |       |
|-----------------|------|-------|-------|-------|-------|--------|-------|--------|-------|--------|-------|-----------------|------|-------|-------|-------|-------|-------|-------|-------|-------|-------|-------|
|                 |      | Mean  | SE    | Mean  | SE    | Mean   | SE    | Mean   | SE    | Mean   | SE    |                 |      | Mean  | SE    |
| Ew CA           | HFE  | 914,9 | 12,6  | 1016  | 11,4  | 1012,5 | 12,3  | 1024,5 | 11,4  | 1038,2 | 12,5  | Lw CA           | HFE  | 174,3 | 6     | 154,7 | 5     | 225,9 | 7,1   | 121,2 | 4,8   | 166,6 | 5     |
|                 | RCO  | 526,4 | 15,5  | 547,6 | 16,6  | 525    | 11,4  | 634,2  | 12,7  | 605,8  | 13,7  |                 | RCO  | 96,3  | 10,3  | 71,8  | 9,8   | 92,8  | 7,5   | 97,8  | 7,5   | 108,8 | 6,7   |
|                 | RLU  | 599,5 | 9,1   | 612   | 9,3   | 648,5  | 8,4   | 701,2  | 11,5  | 704,4  | 12,7  |                 | RLU  | 127,8 | 5,6   | 139,7 | 4,5   | 130,4 | 6     | 152,7 | 6,1   | 126,1 | 8,4   |
|                 | RMO  | 678   | 13,6  | 728,8 | 16,6  | 649,2  | 9,5   | 691,1  | 9,3   | 699,1  | 8,3   |                 | RMO  | 150,1 | 6,7   | 156,8 | 7,9   | 103,4 | 4,1   | 114,4 | 4,8   | 126,7 | 4,3   |
|                 | RPO  | 414   | 7,5   | 458,8 | 8,4   | 435,3  | 7,5   | 489,3  | 8,2   | 554    | 8,5   |                 | RPO  | 79,6  | 3,1   | 68,9  | 2,9   | 73,3  | 2,6   | 69,1  | 2,9   | 66,9  | 3,4   |
|                 | RSD  | 691,1 | 10,5  | 736,1 | 12,1  | 722,4  | 11,2  | 802,7  | 14,7  | 820,7  | 10,5  |                 | RSD  | 131,7 | 7,8   | 109,2 | 5,9   | 108   | 5,5   | 95,4  | 4,6   | 112,6 | 5,2   |
| Ew CWTrad       | HFE  | 3,58  | 0,03  | 3,46  | 0,02  | 3,5    | 0,03  | 3,35   | 0,02  | 3,35   | 0,03  | Lw CWTrad       | HFE  | 4,37  | 0,07  | 4,92  | 0,07  | 3,78  | 0,06  | 3,71  | 0,05  | 4,74  | 0,06  |
|                 | RCO  | 3,5   | 0,05  | 2,83  | 0,06  | 3,59   | 0,06  | 3,02   | 0,03  | 3,08   | 0,04  |                 | RCO  | 4,65  | 0,14  | 3,46  | 0,12  | 4,48  | 0,14  | 3,98  | 0,12  | 4,1   | 0,14  |
|                 | RLU  | 3,75  | 0,03  | 3,83  | 0,03  | 3,9    | 0,03  | 3,37   | 0,03  | 3,54   | 0,03  |                 | RLU  | 4,48  | 0,07  | 5,08  | 0,07  | 5,08  | 0,07  | 4,91  | 0,09  | 4,46  | 0,12  |
|                 | RMO  | 3,09  | 0,05  | 3,05  | 0,05  | 2,92   | 0,03  | 3,01   | 0,03  | 2,75   | 0,02  |                 | RMO  | 3,86  | 0,1   | 4,07  | 0,12  | 3,71  | 0,08  | 4     | 0,08  | 3,42  | 0,05  |
|                 | RPO  | 3,06  | 0,04  | 2,86  | 0,03  | 2,7    | 0,03  | 2,59   | 0,02  | 2,84   | 0,03  |                 | RPO  | 2,94  | 0,07  | 2,81  | 0,05  | 2,79  | 0,06  | 2,75  | 0,05  | 3,04  | 0,05  |
|                 | RSD  | 3,98  | 0,03  | 3,64  | 0,03  | 3,41   | 0,03  | 2,92   | 0,02  | 3,05   | 0,02  |                 | RSD  | 5,46  | 0,12  | 5,33  | 0,1   | 4,1   | 0,07  | 3,67  | 0,06  | 3,93  | 0,09  |
| Ew CD/CWT ratio | HFE  | 42,01 | 0,63  | 47,99 | 0,61  | 47,94  | 0,68  | 49,76  | 0,61  | 51,07  | 0,75  | Lw CD/CWT ratio | HFE  | 6,59  | 0,23  | 5,17  | 0,17  | 9,95  | 0,33  | 5,26  | 0,20  | 5,76  | 0,17  |
|                 | RCO  | 24,58 | 0,77  | 31,87 | 1,11  | 24,01  | 0,60  | 33,89  | 0,70  | 32,12  | 0,78  |                 | RCO  | 3,23  | 0,31  | 3,12  | 0,35  | 3,21  | 0,23  | 3,93  | 0,26  | 4,35  | 0,24  |
|                 | RLU  | 26,16 | 0,45  | 25,87 | 0,43  | 27,20  | 0,41  | 34,27  | 0,66  | 32,01  | 0,59  |                 | RLU  | 4,43  | 0,18  | 4,39  | 0,14  | 4,07  | 0,18  | 5,15  | 0,21  | 4,47  | 0,27  |
|                 | RMO  | 35,88 | 0,60  | 38,72 | 0,66  | 37,43  | 0,60  | 38,27  | 0,60  | 41,75  | 0,56  |                 | RMO  | 6,02  | 0,19  | 6,00  | 0,21  | 4,47  | 0,15  | 4,57  | 0,17  | 5,97  | 0,19  |
|                 | RPO  | 22,48 | 0,46  | 26,13 | 0,48  | 26,11  | 0,44  | 30,47  | 0,54  | 31,49  | 0,48  |                 | RPO  | 4,57  | 0,17  | 4,00  | 0,15  | 4,68  | 0,21  | 4,08  | 0,16  | 3,51  | 0,16  |
|                 | RSD  | 28,18 | 0,49  | 32,97 | 0,60  | 34,23  | 0,56  | 44,23  | 0,85  | 43,57  | 0,61  |                 | RSD  | 3,79  | 0,22  | 3,34  | 0,18  | 4,14  | 0,19  | 4,32  | 0,21  | 4,98  | 0,25  |
| Ew TNo indices  | HFE  | 1,594 | 0,083 | 1,337 | 0,063 | 1,603  | 0,077 | 1,236  | 0,074 | 1,276  | 0,035 | Lw TNo indices  | HFE  | 1,668 | 0,135 | 1,902 | 0,105 | 1,432 | 0,072 | 0,905 | 0,056 | 1,972 | 0,122 |
|                 | RCO  | 0,798 | 0,103 | 0,944 | 0,047 | 0,954  | 0,076 | 1,042  | 0,063 | 0,713  | 0,032 |                 | RCO  | 1,366 | 0,124 | 0,758 | 0,033 | 1,465 | 0,122 | 1,213 | 0,031 | 1,148 | 0,098 |
|                 | RLU  | 0,877 | 0,095 | 0,839 | 0,069 | 0,962  | 0,057 | 0,944  | 0,076 | 0,635  | 0,027 |                 | RLU  | 1,186 | 0,137 | 1,348 | 0,083 | 1,46  | 0,113 | 1,229 | 0,049 | 1,05  | 0,124 |
|                 | RMO  | 1,367 | 0,111 | 1,146 | 0,078 | 1,042  | 0,068 | 1,18   | 0,075 | 0,806  | 0,057 |                 | RMO  | 0,604 | 0,061 | 0,81  | 0,086 | 0,704 | 0,061 | 0,926 | 0,103 | 0,518 | 0,057 |
|                 | RPO  | 0,493 | 0,039 | 0,46  | 0,03  | 0,441  | 0,037 | 0,508  | 0,043 | 0,862  | 0,054 |                 | RPO  | 0,499 | 0,07  | 0,429 | 0,061 | 0,249 | 0,02  | 0,304 | 0,023 | 0,639 | 0,056 |
|                 | RSD  | 1,054 | 0,079 | 1,169 | 0,066 | 0,901  | 0,05  | 0,654  | 0,024 | 0,78   | 0,045 |                 | RSD  | 1,306 | 0,085 | 1,093 | 0,056 | 0,503 | 0,049 | 0,329 | 0,037 | 0,596 | 0,074 |
