# Supplementary material
Source: MDPI journal article supplement (https://www.mdpi.com/1999-4907/12/4/494)
Supplement: s1 [file s1]

**Table S1.** Edaphic properties of the studied sites derived from the SoilGrids database. Site data were obtained from gridpoints of 0.25x0.25 km spatial extension.

| Site | Depth [cm] | Organic carbon density [g/dm <sup>3</sup> ] | Soil organic carbon stock [t/ha] | Bulk density [cg/cm <sup>3</sup> ] | Clay content [g/kg] | Coarse fragments [cm <sup>3</sup> /dm <sup>3</sup> ] | Sand[g/kg] | Silt [g/kg] | Cation exchange capacity (at ph 7) [mmol(c)/kg] | Nitrogen [cg/kg] | Soil organic carbon [dg/kg] | pH water [pH*10] | Soil group          | Probability [%] |
|------|------------|---------------------------------------------|----------------------------------|------------------------------------|---------------------|------------------------------------------------------|------------|-------------|-------------------------------------------------|------------------|-----------------------------|------------------|---------------------|-----------------|
| RCO  | 0-5        | 588                                         | 63                               | 107                                | 278                 | 175                                                  | 344        | 379         | 273                                             | 460              | 683                         | 56               | <i>Cambisols</i>    | 34              |
|      | 5-15       | 320                                         |                                  | 119                                | 317                 | 222                                                  | 335        | 347         | 238                                             | 350              | 466                         | 57               | <i>Luvisols</i>     | 18              |
|      | 15-30      | 280                                         |                                  | 127                                | 293                 | 223                                                  | 334        | 373         | 228                                             | 202              | 337                         | 57               | <i>Andosols</i>     | 9               |
|      | 30-60      | 124                                         |                                  | 142                                | 278                 | 276                                                  | 350        | 371         | 217                                             | 155              | 166                         | 59               | <i>Leptosols</i>    | 7               |
|      | 60-100     | 76                                          |                                  | 152                                | 285                 | 284                                                  | 354        | 361         | 197                                             | 105              | 115                         | 62               | <i>Gleysols</i>     | 6               |
|      | 100-200    | 54                                          |                                  | 154                                | 291                 | 271                                                  | 358        | 351         | 184                                             | 96               | 134                         | 66               |                     |                 |
| RLU  | 0-5        | 536                                         | 61                               | 111                                | 274                 | 144                                                  | 358        | 368         | 289                                             | 449              | 642                         | 55               | <i>Cambisols</i>    | 36              |
|      | 5-15       | 307                                         |                                  | 126                                | 276                 | 151                                                  | 358        | 366         | 284                                             | 305              | 446                         | 55               | <i>Podzols</i>      | 15              |
|      | 15-30      | 254                                         |                                  | 134                                | 240                 | 155                                                  | 383        | 377         | 256                                             | 309              | 337                         | 55               | <i>Luvisols</i>     | 13              |
|      | 30-60      | 154                                         |                                  | 150                                | 252                 | 160                                                  | 394        | 354         | 235                                             | 259              | 195                         | 55               | <i>Andosols</i>     | 8               |
|      | 60-100     | 88                                          |                                  | 155                                | 251                 | 179                                                  | 402        | 347         | 223                                             | 224              | 148                         | 59               | <i>Gleysols</i>     | 6               |
|      | 100-200    | 80                                          |                                  | 158                                | 257                 | 207                                                  | 416        | 327         | 196                                             | 221              | 141                         | 65               |                     |                 |
| RMO  | 0-5        | 527                                         | 57                               | 121                                | 259                 | 150                                                  | 346        | 395         | 287                                             | 477              | 600                         | 62               | <i>Cambisols</i>    | 50              |
|      | 5-15       | 281                                         |                                  | 126                                | 269                 | 183                                                  | 347        | 384         | 245                                             | 262              | 357                         | 62               | <i>Luvisols</i>     | 11              |
|      | 15-30      | 260                                         |                                  | 132                                | 275                 | 190                                                  | 346        | 379         | 224                                             | 205              | 318                         | 62               | <i>Albeluvisols</i> | 8               |
|      | 30-60      | 119                                         |                                  | 143                                | 276                 | 210                                                  | 349        | 375         | 217                                             | 159              | 247                         | 63               | <i>Gleysols</i>     | 5               |
|      | 60-100     | 64                                          |                                  | 149                                | 274                 | 240                                                  | 356        | 371         | 214                                             | 114              | 168                         | 65               | <i>Andosols</i>     | 4               |
|      | 100-200    | 53                                          |                                  | 151                                | 281                 | 254                                                  | 364        | 355         | 195                                             | 112              | 137                         | 70               |                     |                 |
| RPO  | 0-5        | 507                                         | 58                               | 105                                | 311                 | 120                                                  | 302        | 387         | 285                                             | 881              | 652                         | 56               | <i>Cambisols</i>    | 30              |
|      | 5-15       | 325                                         |                                  | 120                                | 347                 | 135                                                  | 292        | 361         | 265                                             | 289              | 380                         | 55               | <i>Luvisols</i>     | 15              |
|      | 15-30      | 236                                         |                                  | 132                                | 348                 | 117                                                  | 297        | 355         | 251                                             | 211              | 345                         | 56               | <i>Podzols</i>      | 10              |
|      | 30-60      | 114                                         |                                  | 143                                | 334                 | 120                                                  | 300        | 366         | 222                                             | 180              | 163                         | 56               | <i>Gleysols</i>     | 8               |
|      | 60-100     | 76                                          |                                  | 147                                | 351                 | 131                                                  | 311        | 338         | 205                                             | 140              | 93                          | 58               | <i>Albeluvisols</i> | 5               |
|      | 100-200    | 79                                          |                                  | 149                                | 347                 | 146                                                  | 323        | 330         | 183                                             | 148              | 103                         | 62               |                     |                 |
| RSD  | 0-5        | 473                                         | 57                               | 109                                | 363                 | 145                                                  | 263        | 374         | 310                                             | 733              | 705                         | 56               | <i>Cambisols</i>    | 23              |
|      | 5-15       | 271                                         |                                  | 122                                | 394                 | 156                                                  | 252        | 354         | 247                                             | 325              | 370                         | 57               | <i>Luvisols</i>     | 21              |
|      | 15-30      | 234                                         |                                  | 129                                | 375                 | 149                                                  | 261        | 365         | 203                                             | 235              | 305                         | 57               | <i>Gleysols</i>     | 10              |
|      | 30-60      | 135                                         |                                  | 146                                | 365                 | 161                                                  | 275        | 360         | 185                                             | 215              | 177                         | 59               | <i>Albeluvisols</i> | 9               |
|      | 60-100     | 68                                          |                                  | 151                                | 379                 | 159                                                  | 264        | 357         | 182                                             | 143              | 125                         | 61               | <i>Chernozems</i>   | 7               |
|      | 100-200    | 69                                          |                                  | 152                                | 389                 | 167                                                  | 256        | 355         | 175                                             | 129              | 116                         | 65               |                     |                 |
| HFE  | 0-5        | 337                                         | 41                               | 133                                | 206                 | 104                                                  | 443        | 352         | 188                                             | 602              | 412                         | 62               | <i>Cambisols</i>    | 19              |
|      | 5-15       | 194                                         |                                  | 138                                | 209                 | 112                                                  | 409        | 381         | 197                                             | 226              | 200                         | 62               | <i>Alisols</i>      | 18              |
|      | 15-30      | 144                                         |                                  | 141                                | 226                 | 110                                                  | 570        | 204         | 178                                             | 192              | 97                          | 62               | <i>Luvisols</i>     | 17              |
|      | 30-60      | 78                                          |                                  | 147                                | 234                 | 116                                                  | 572        | 194         | 161                                             | 181              | 49                          | 64               | <i>Arenosols</i>    | 9               |
|      | 60-100     | 48                                          |                                  | 147                                | 235                 | 110                                                  | 541        | 224         | 152                                             | 138              | 33                          | 70               | <i>Chernozems</i>   | 7               |
|      | 100-200    | 37                                          |                                  | 147                                | 228                 | 121                                                  | 524        | 248         | 157                                             | 86               | 20                          | 75               |                     |                 |
